# Supplementary material for: Different Strategies Affect Enzyme Packaging into Bacterial Outer Membrane Vesicles
Source: MDPI journal article supplement (doi:10.3390/bioengineering10050583), 2023-05-11
Supplement: s1 [file s1]

# Different Strategies Affect Enzyme Packaging into Bacterial Outer Membrane Vesicles

Scott N. Dean <sup>1,†</sup>, Meghna Thakur <sup>2,†</sup>, Joseph R. Spangler <sup>1</sup>, Aaron D. Smith <sup>1</sup>, Sean P. Garin <sup>1,‡</sup>, Scott A. Walper <sup>1,§</sup> and Gregory A. Ellis <sup>1,\*</sup>

<sup>1</sup> Center for Bio/Molecular Science and Engineering, Code 6900, U.S. Naval Research Laboratory, Washington, DC 20375, USA

<sup>2</sup> College of Science, George Mason University, Fairfax, VA 22030, USA; meghna.thakur.ctr.in@nrl.navy.mil

\* Correspondence: gregory.ellis@nrl.navy.mil

† These authors contributed equally to this work.

‡ Current address: University of Maryland Medical Intelligent Imaging (UM2ii) Center, Department of Diagnostic Radiology and Nuclear Medicine, University of Maryland School of Medicine, Baltimore, MD 20201, USA.

§ Current address: US Office of Naval Research, 86 Blenheim Crescent, Ruislip, Middlesex HA4 7GB, UK.

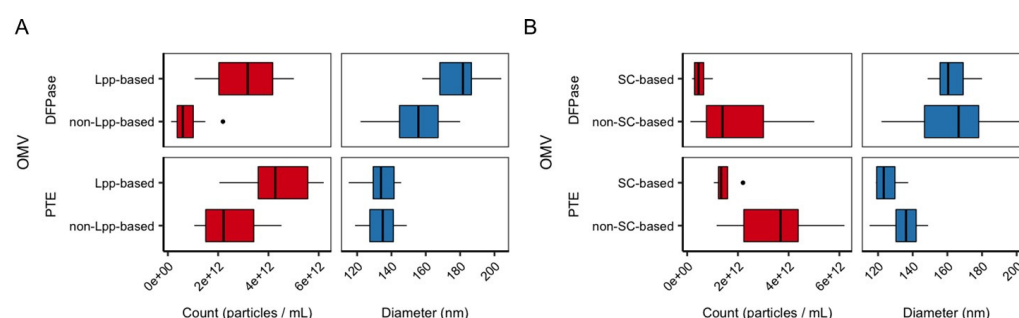

**Figure S1.** Differences in count and diameter by linker categorization. The count (particles/mL) and diameters (nm) are compared of (A) Lpp'-based versus non-Lpp'-based OMVs and (B) SC-based versus non-SC-based OMVs. Dots represent outliers.

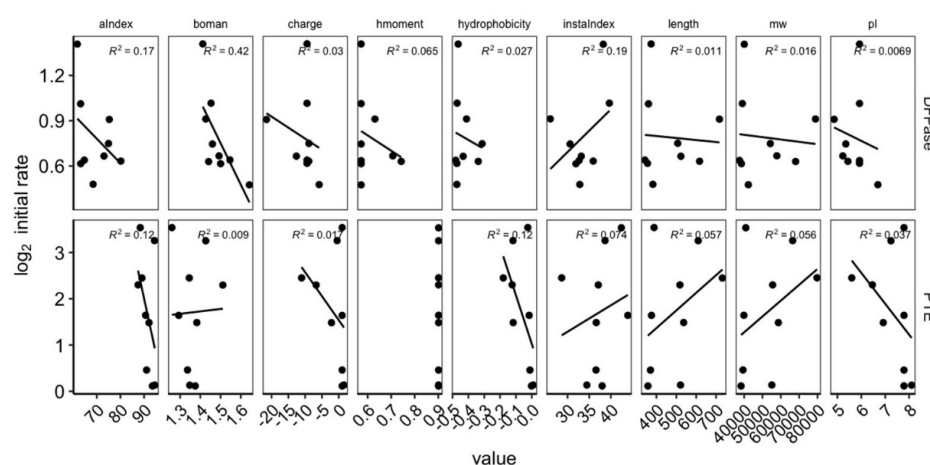

**Figure S2.** Visual representation of correlations between linker physiochemical characteristics and enzymatic activity (log<sub>2</sub> initial rate). Initial rate taken from the linear portion of the first 20 minutes of the paraoxon degradation reaction. Sequence used for calculating characteristics does not include enzyme.

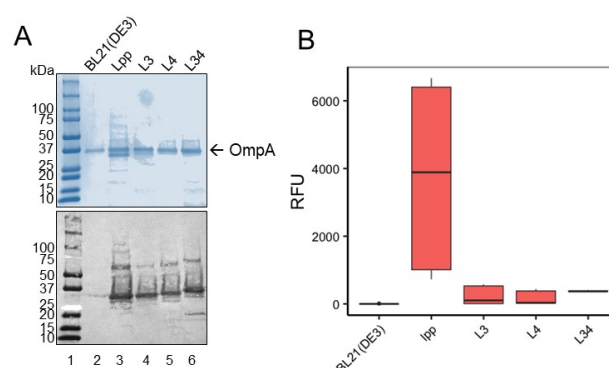

**Figure S3.** Effect of Lpp'-based linkers on mCherry fluorescence. (A) Coomassie gel of Lpp'-linker mCherry fusions (top) and corresponding immunoblot with anti-mCherry antibody (bottom) showing a major band at ~35 kDa in the total protein gel corresponding to the abundant OmpA, while 6× His-tagged-mCherry fusions are shown at increasing size corresponding to increasing linker length. Lane 1: Molecular weight marker, lane 2: BL21(DE3), lane 3: Lpp'-mCherry, lane 4: L3- mCherry, lane 5: L4- mCherry, lane 6: L34-mCherry. (B) Fluorescence intensity of OMVs from cultures producing Lpp'-based linkers fused to mCherry. Boxplot using data from four biological experiments in triplicate (n = 12).

**Table S1.** Sequences of anchors/directors and linkers.

| Name     | Sequence                                                                                                                                                                                                                                                                                                                                                                                                                                                                                                                                                                                                                                                                                                                                                                                                                                                                                                                                                                                                                                                                                                                                                                                                                                                                                                                                                                  |
|----------|---------------------------------------------------------------------------------------------------------------------------------------------------------------------------------------------------------------------------------------------------------------------------------------------------------------------------------------------------------------------------------------------------------------------------------------------------------------------------------------------------------------------------------------------------------------------------------------------------------------------------------------------------------------------------------------------------------------------------------------------------------------------------------------------------------------------------------------------------------------------------------------------------------------------------------------------------------------------------------------------------------------------------------------------------------------------------------------------------------------------------------------------------------------------------------------------------------------------------------------------------------------------------------------------------------------------------------------------------------------------------|
| Lpp'-PTE | <p>TTTGTTTAACTTTAAGAAGGAGATATACCATGAAAGCGACCAAA<br/> CTGGTGCTGGGCGCGGTGATTCTGGGCAGCACCTGCTGGCGGG<br/> CTGCAGCAGCAACGCGAAAATTGATCAGGGCGGTGGCAGCGG<br/> CGGTGGCAGCGGCGGTGGGAGCCGCATTAAACACCGTGCGCGGGCC<br/> GATTACCATTAGCGAAGCGGGCTTTACCCTGACCCATGAACATATT<br/> GCGGCAGCAGCGGGGCTTTCTGCGCGCGTGGCCGGAATTTTTTGCG<br/> AGCCGCAAAGCGCTGGCGGAAAAAGCGGTGCGCGGCCTGCGCCGCG<br/> CGCGCGCGGCGGGCGTGCACACCATTTGTGGATGTGAGCACCTTTGAT<br/> ATTGGCCGCGATGTGAGCCTGCTGGCGGAAGTGAGCCGCGCGGCGG<br/> ATGTGCATATTGTGGCGGCGACAGGCCTGTGGTTTGATCCGCCGCTG<br/> AGCATGCGCCTGCGCAGCGTGGAAGAACTGACCCAGTTTTTCTGCG<br/> CGAAATTCAGTATGGCATTGAAGATACCGGCATTTCGCGCGGGCATT<br/> TTAAAGTGGCGACCAACCGGCAAAGCGACCCCGTTTCAGGAACGGT<br/> GCTGAAAGCGGCGGCGCGCGCGAGCCTGGCGACCGGCGTGCCGGTG<br/> ACCACCCATACCGCGGCGAGCCAGCGCGATGGCGAACAGCAGGCGG<br/> CGATTTTTGAAAGATGATCTGAGCTATCTGACCGCGCTGGCGGCGCG<br/> CGGCTATCTGATTGGCCCCGAAGGCCTGAGCCCCGAGCCGCGTGTGCAT<br/> TGGCCATAGCGATGATACCGTGGATCATATTCCGCATAGCGCGATTG<br/> GCCTGGAAGATAACGCGAGCGCGAGCGCGCTGCTGGGCATTTCGCAG<br/> CTGGCAGACCCGCGCGCTGCTGATTAAAGCGCTGATTGATCAGGGCT<br/> ATATGAAACAGATTCTGGTGAGCAACGATTGGCTGTTTGGCTTTAGC<br/> AGCTATGTGACCAACATTATGGATGTGATGGATCGCGTGAACCCGG<br/> ATGGCATGGCGTTTATTCCGCTGCGCGTGATTCCGTTTCTGCGCGAA<br/> AAAGGCGTGCCGCGAGAAACCCTGGCGGGCATTACCGTGACCAACC<br/> CGGCGCGCTTTCTGAGCCCCGACCTGCGCGCGAGCCACCACCACCA<br/> CCACCACTGA</p> |
| L3-PTE   | <p>TTTGTTTAACTTTAAGAAGGAGATATACCATGAAAGCGACCAAA<br/> CTGGTGCTGGGCGCGGTGATTCTGGGCAGCACCTGCTGGCGGG</p>                                                                                                                                                                                                                                                                                                                                                                                                                                                                                                                                                                                                                                                                                                                                                                                                                                                                                                                                                                                                                                                                                                                                                                                                                                                                      |

CTGCAGCAGCAACGCGAAAATTGATCAGGGCGGTGGCAGCGG  
 CGGTGGCAGCGGCGGTGGGAGCGCCACCGGTCCGGAAGCGGT  
 CCGACCAGCGCAGGTCCGCGCATTAAACACCGTGCGCGGCCCGATT  
 ACCATTAGCGAAGCGGGCTTTACCCTGACCCATGAACATATTTGCGG  
 CAGCAGCGCGGGCTTTCTGCGCGCGTGGCCGGAATTTTTTGGCAGCC  
 GCAAAGCGCTGGCGGAAAAAGCGGTGCGCGGCCTGCGCCGCGCGCG  
 CGCGGCGGGCGTGCGCACCATTGTGGATGTGAGCACCTTTGATATTG  
 GCCGCGATGTGAGCCTGCTGGCGGAAGTGAGCCGCGCGGCGGATGT  
 GCATATTGTGGCGGCGACAGGCCGTGTGGTTTGATCCGCCGCTGAGCA  
 TGCGCCTGCGCAGCGTGGAAGAACTGACCCAGTTTTTTCTGCGCGAA  
 ATTCAGTATGGCATTGAAGATACCGGCATTGCGCGGGCATTATTAA  
 AGTGGCGACCACCGGCAAAGCGACCCCGTTTCAGGAACTGGTGCTG  
 AAAGCGGCGGCGCGCGGAGCCTGGCGACCGGCGTGCCGGTGACCA  
 CCCATACCGCGGCGAGCCAGCGCGATGGCGAACAGCAGGCGGCGAT  
 TTTTGAAAGCGAAGGCCTGAGCCCGAGCCGCGTGTGCATTGGCCATA  
 GCGATGATACCGATGATCTGAGCTATCTGACCGCGCTGGCGGCGCGC  
 GGCTATCTGATTGGCCTGGATCATATTCCGCATAGCGCGATTGGCCT  
 GGAAGATAACGCGAGCGCGAGCGCGCTGCTGGGCATTTCGAGCTGG  
 CAGACCCGCGCGCTGCTGATTAAAGCGCTGATTGATCAGGGCTATAT  
 GAAACAGATTCTGGTGAGCAACGATTGGCTGTTTGGCTTTAGCAGCT  
 ATGTGACCAACATTATGGATGTGATGGATCGCGTGAACCCGGATGG  
 CATGGCGTTTATTCCGCTGCGCGTGATTCCGTTTCTGCGCGAAAAAG  
 GCGTGCCGCGAGGAAACCCTGGCGGGCATTACCGTGACCAACCCGGC  
 GCGCTTTCTGAGCCCGACCCTGCGCGCGAGCCACCACCACCAC  
 CACTGA

L4-PTE

TTTGTTTAACTTTAAGAAGGAGATATACCATGAAAGCGACCAAA  
 CTGGTGCTGGGCGCGGTGATTCTGGGCAGCACCTGCTGGCGGG  
 CTGCAGCAGCAACGCGAAAATTGATCAGGGCGGTGGCAGCGG  
 CGGTGGCAGCGGCGGTGGGAGCCCGGCATCTCCGGCCCCGCGG  
 CTGGTCCAGCACCGCCGGCCCCAACCGCACCGCGCATTAAACCCG  
 TGCGCGGCCCGATTACCATTAGCGAAGCGGGCTTTACCCTGACCCAT  
 GAACATATTTGCGGCAGCAGCGCGGGCTTTCTGCGCGCGTGGCCGG  
 AATTTTTTGGCAGCCGCAAAGCGCTGGCGGAAAAAGCGGTGCGCGG  
 CCTGCGCCGCGCGCGCGCGGGCGGTGCGCACCATTTGTGGATGTG  
 AGCACCTTTGATATTGGCCGCGATGTGAGCCTGCTGGCGGAAGTGAG  
 CCGCGCGGCGGATGTGCATATTGTGGCGGCGACAGGCCTGTGGTTTG  
 ATCCGCCGCTGAGCATGCGCCTGCGCAGCGTGGAAGAACTGACCCA  
 GTTTTTTCTGCGCGAAATTCAGTATGGCATTGAAGATACCGGCATT  
 GCGCGGGCATTATTAAAGTGCGGACCACCGGCAAAGCGACCCCGTT  
 TCAGGAACTGGTGCTGAAAGCGGCGGCGCGCGAGCCTGGCGACC  
 GGCGTGCCGGTGACCACCCATACCGCGGCGAGCCAGCGCGATGGCG  
 AACAGCAGGCGGCGATTTTTGAAAGCGAAGGCCTGAGCCCGAGCCG  
 CGTGTGCATTGGCCATAGCGATGATACCGATGATCTGAGCTATCTGA  
 CCGCGCTGGCGGCGCGCGGCTATCTGATTGGCCTGGATCATATTCCG  
 CATAGCGCGATTGGCCTGGAAGATAACGCGAGCGCGAGCGCGCTGC  
 TGGGCATTTCGAGCTGGCAGACCCGCGCGCTGCTGATTAAAGCGCTG  
 ATTGATCAGGGCTATATGAAACAGATTCTGGTGAGCAACGATTGGCT  
 GTTTGGCTTTAGCAGCTATGTGACCAACATTATGGATGTGATGGATC  
 GCGTGAACCCGATGGCATGGCGTTTATTCCGCTGCGCGTGATTCCG  
 TTTCTGCGCGAAAAAGGCGTGCCGCGAGGAAACCCTGGCGGGCATT

CCGTGACCAACCCGGCGCGCTTTCTGAGCCCGACCCTGCGCGCGAGC  
CACCACCACCACCACCTGA

L34-PTE

TTTGTTTAACTTTAAGAAGGAGATATACCATGAAAGCGACCAAA  
CTGGTGCTGGGCGCGGTGATTCTGGGCAGCACCTGCTGGCGGG  
CTGCAGCAGCAACGCGAAAATTGATCAGGGCGGTGGCAGCGG  
CGGTGGCAGCGGCGGTGGGAGCGCCACCGGTCCGGCAAGCGGT  
CCGACCAGCGCAGGTCCGCCGGCATCTCCGGCCCCGCCGGCTGG  
TCCAGCACCGCCGGCCCCAACCGCACCGCGCATTAACACCGTGCG  
CGGCCCCGATTACCATTAGCGAAGCGGGCTTTACCCTGACCCATGAAC  
ATATTTGCGGCAGCAGCGCGGGCTTTCTGCGCGCTGGCCGGAATTT  
TTTGGCAGCCGCAAAGCGCTGGCGGAAAAAGCGGTGCGCGGCTGC  
GCCGCGCGCGCGGGCGGGCGTGCGCACCATTGTGGATGTGAGCAC  
CTTTGATATTGGCCGCGATGTGAGCCTGCTGGCGGAAAGTGAAGCCGCG  
CGGCGGATGTGCATATTGTGGCGGCGACAGGCCTGTGGTTTGATCCG  
CCGCTGAGCATGCGCCTGCGCAGCGTGGAAGAACTGACCCAGTTTTT  
TCTGCGCGAAATTCAGTATGGCATTGAAGATACCGGCATTGCGCGCG  
GCATTATTAAGTGGCGACCACCGGCAAAGCGACCCCGTTTCAGGA  
ACTGGTGCTGAAAGCGGCGGCGCGCGAGCCTGGCGACCGGCGTG  
CCGGTGACCACCCATACCGCGGCGAGCCAGCGCGATGGCGAACAGC  
AGGCGGCGATTTTTGAAAGCGAAGGCCTGAGCCCGAGCCGCGTG  
CATTGGCCATAGCGATGATACCGATGATCTGAGCTATCTGACCGCGC  
TGGCGGCGCGCGGCTATCTGATTGGCCTGGATCATATTCCGCATAGC  
GCGATTGGCCTGGAAGATAACGCGAGCGCGAGCGCGCTGCTGGGCA  
TTGCGAGCTGGCAGACCCGCGCGCTGCTGATTAAAGCGCTGATTGAT  
CAGGGCTATATGAAACAGATTCTGGTGAGCAACGATTGGCTGTTTGG  
CTTTAGCAGCTATGTGACCAACATTATGGATGTGATGGATCGCGTGA  
ACCCGGATGGCATGGCGTTTATTCCGCTGCGCGTGATTCCGTTTCTG  
CGCGAAAAAGGCGTGCCGCGAGGAAACCTGGCGGGCATTACCGTGA  
CCAACCCGGCGCGCTTTCTGAGCCCGACCCTGCGCGCGAGCCACCAC  
CACCACCACCACCTGA

BtuF-PTE

atgGCTAAGTCACTGTTTCAGGGCGCTGGTCGCCCTGTCTTTTCTTGC  
GCCACTGTGGCTCAACGCCGCGCCGCGCGTCATCACGCTTTCTCC  
CGCCAACACTGAACTTGCCCTTTGCCGCCGGGATCACGCCGGTTG  
GGGTCAGCAGCTATTCCGACTATCCTCCACAAGCGCAAAAGATT  
GAGCAGGTTTCCACCTGGCAGGGGATGAATCTGGAACGCATTGT  
CGCGCTGAAACCCGATCTGGTGATTGCCTGGCGTGAGGTAATG  
CCGAGCGGCAGGTTGACCAGCTGGCTTCGCTGGGAATAAAAGTG  
ATGTGGGTTCGATGCGACAAGCATTGAACAAATTGCCAATGCGTT  
ACGTCAACTGGCCCCCTGGAGTCCGCAACCAGACAAGGCCGAA  
CAAGCCGCGCAATCCCTGCTGGATCAGTACGCGCAATTGAAAGC  
GCAATATGCTGATAAACCTAAAAAACGTGTTTTTCTGCAATTCGG  
CATTAATCCGCCATTTACCAGTGGAAGAGAGTCGATTGAGAACC  
AGGTACTCGAAGTTTGTGGCGGAGAAAACATCTTTAAAGACAGC  
CGGGTTCCCTGGCCGCAAGTTAGCCGCGAACAGGTGTTAGCACG  
CTCGCCACAGGCGATTGTATTACAGGCGGACCGGACCAAATTC  
CTAAAATCAAACAATACTGGGGTGAACAGCTCAAAATTCCCCTT  
ATTCCTCTCACGAGTGACTGGTTTGAACGTGCAAGCCCACGTATT  
ATCCTCGCTGCACAACAGCTCTGTAATGCGCTTTCACAGGTAGAT  
AATTCGAGCTCGAACAACAACAATAACAATAACAACAACC

TCGGGATCGAGGGAAGGATTTACATATGAGCATTGGCACCGGC  
 GATCGCATTAACACCGTGCGCGGCCCGATTACCATTAGCGAAGCGG  
GCTTTACCCTGACCCATGAACATATTTGCGGCAGCAGCGCGGGCTTT  
CTGCGCGCGTGGCCGGAATTTTTTGGCAGCCGCAAAGCGCTGGCGG  
AAAAAGCGGTGCGCGGCCTGCGCCGCGCGCGCGCGGGCGGTGCG  
CACCATTTGTGGATGTGAGCACCTTTGATATTGGCCGCGATGTGAGCC  
TGCTGGCGGAAGTGAGCCGCGCGGCGGATGTGCATATTGTGGCGGC  
GACAGGCCTGTGGTTTGATCCGCGCGTGAGCATGCGCCTGCGCAGCG  
TGGAAGAACTGACCCAGTTTTTCTGCGCGAAATTCAGTATGGCATT  
GAAGATACCGGCATTTCGCGCGGGCATTATTAAAGTGCGGACCACCG  
GCAAAGCGACCCCGTTTCAGGAACTGGTGCTGAAAGCGGCGGCGCG  
CGCGAGCCTGGCGACCGGCGTGCCGGTGACCACCCATACCGCGGCG  
AGCCAGCGCGATGGCGAACAGCAGGCGGCGATTTTTGAAAGCGAAG  
GCCTGAGCCCGAGCCGCGTGTCATTGGCCATAGCGATGATACCGAT  
GATCTGAGCTATCTGACCGCGCTGGCGGCGCGCGGCTATCTGATTGG  
CCTGGATCATATTCCGCATAGCGCGATTGGCCTGGAAGATAACGCGA  
GCGCGAGCGCGCTGCTGGGCATTTCGAGCTGGCAGACCCGCGCGCT  
GCTGATTAAAGCGCTGATTGATCAGGGCTATATGAAACAGATTCTGG  
TGAGCAACGATTGGCTGTTTGGCTTTAGCAGCTATGTGACCAACATT  
ATGGATGTGATGGATCGCGTGAACCCGGATGGCATGGCGTTTATTCC  
GCTGCGCGTGATTCCGTTTCTGCGCGAAAAAGGCGTGCCGAGGAA  
ACCCTGGCGGGCATTACCGTGACCAACCCGCGCGCTTTCTGAGCCC  
GACCCTGCGCGCGAGCGAATTCCCTGCAGGTAATTAA

MBP-PTE

ATGAAAATAAAAAACAGGTGCACGCATCCTCGCATTATCCGCATT  
 AACGACGATGATGTTTTCCGCCTCGGCTCTCGCCAAAATCGAAG  
 AAGGTAAACTGGTAATCTGGATTAACGGCGATAAAGGCTATAAC  
 GGTCTCGCTGAAGTCGGTAAGAAATTCGAGAAAGATACCGGAAT  
 TAAAGTCACCGTTGAGCATCCGGATAAACTGGAAGAGAAATTCC  
 CACAGGTTGCGGCAACTGGCGATGGCCCTGACATTATCTTCTGGG  
 CACACGACCGCTTTGGTGGCTACGCTCAATCTGGCCTGTTGGCTG  
 AAATCACCCCGGACAAAGCGTTCCAGGACAAGCTGTATCCGTTT  
 ACCTGGGATGCCGTACGTTACAACGGCAAGCTGATTGCTTACCC  
 GATCGCTGTTGAAGCGTTATCGCTGATTTATAACAAAGATCTGCT  
 GCCGAACCCGCCAAAAACCTGGGAAGAGATCCCGGCGCTGGAT  
 AAAGAAGTGAAGCGGAAAGGTAAGAGCGCGCTGATGTTCAACC  
 TGCAAGAACCGTACTTCACCTGGCCGCTGATTGCTGCTGACGGG  
 GGTTATGCGTTCAAGTATGAAAACGGCAAGTACGACATTAAAGA  
 CGTGGGCGTGATAACGCTGGCGCGAAAGCGGGTCTGACCTTCC  
 TGGTTGACCTGATTAAAAACAAACACATGAATGCAGACACCGAT  
 TACTCCATCGCAGAAGCTGCCTTAATAAAGGCGAAACAGCGAT  
 GACCATCAACGGCCCGTGGGCATGGTCCAACATCGACACCAGCA  
 AAGTGAATTATGGTGTAACGGTACTGCCGACCTTCAAGGGTCAA  
 CCATCCAAACCGTTTCGTTGGCGTGCTGAGCGCAGGTATTAACGC  
 CGCCAGTCCGAACAAAGAGCTGGCAAAAGAGTTCTCGAAAAC  
 TATCTGCTGACTGATGAAGGTCTGGAAGCGGTTAATAAAGACAA  
 ACCGCTGGGTGCCGTAGCGCTGAAGTCTTACGAGGAAGAGTTGG  
 TGAAAGATCCGCGTATTGCCGCCACTATGGAAAACGCCAGAAA  
 GGTGAAATCATGCCGAACATCCCGCAGATGTCCGCTTTCTGGTAT  
 GCCGTGCGTACTGCGGTGATCAACGCCGCCAGCGGTCTGTCAGAC  
 TGTCGATGAAGCCCTGAAAGACGCGCAGACTAATTTCGAGCTCGA

ACAACAACAACAATAACAATAACAACAACCTCGGGATCGAGGG  
AAGGATTTCACATATGAGCATTGGCACCGGCGATCGCATTAACAC  
CGTGCGCGGCCCCGATTACCATTAGCGAAGCGGGCTTTACCCTGACCC  
ATGAACATATTTGCGGCAGCAGCGCGGGCTTTCTGCGCGCGTGCGCG  
GAATTTTTTGGCAGCCGCAAAGCGCTGGCGGAAAAAGCGGTGCGCG  
GCCTGCGCCGCGCGCGCGCGGGCGTGCGCACCATTTGTGGATGT  
GAGCACCTTTGATATTGGCCGCGATGTGAGCCTGCTGGCGGAAGTGA  
GCCGCGCGGCGGATGTGCATATTGTGGCGGCGACAGGCCTGTGGTTT  
GATCCGCCGCTGAGCATGCGCCTGCGCAGCGTGGAAGAACTGACCC  
AGTTTTTTCTGCGCGAAATTCAGTATGGCATTGAAGATACCGGCATT  
CGCGCGGGCATTATTAAAGTGGCGACCACCGGCAAAGCGACCCCGT  
TTCAGGAACTGGTGCTGAAAGCGGCGGCGCGCGAGCCTGGCGAC  
CGGCGTGCCGGTGACCACCCATACCGCGGCGAGCCAGCGCGATGGC  
GAACAGCAGGCGGCGATTTTTGAAAGCGAAGGCCTGAGCCCCGAGCC  
GCGTGTGCATTGGCCATAGCGATGATACCGATGATCTGAGCTATCTG  
ACCGCGCTGGCGGCGCGCGGCTATCTGATTGGCCTGGATCATATTCC  
GCATAGCGCGATTGGCCTGGAAGATAACGCGAGCGCGAGCGCGCTG  
CTGGGCATTTCGACGCTGGCAGACCCGCGCGCTGCTGATTAAAGCGCT  
GATTGATCAGGGCTATATGAAACAGATTCTGGTGAGCAACGATTGG  
CTGTTTGGCTTTAGCAGCTATGTGACCAACATTATGGATGTGATGGA  
TCGCGTGAACCCGATGGCATGGCGTTTATTCCGCTGCGCGTGATT  
CGTTTCTGCGCGAAAAAGGCGTGCCGCGAGGAAACCCTGGCGGGCAT  
TACCGTGACCAACCCGCGCGCTTTCTGAGCCCGACCCTGCGCGCGA  
GCGAATTCCCTGCAGGTAATTAA

SLP-PTE

ATGAACATGACAAAAGGTGCACTCATCTCAGCCTTTCATTTTTG  
CTTGCCGCATGTAGTTCAATTCCGCAAAATATCAAAGGCAATAA  
CCAACCTGATATTCAAAAAAGTTTTGTTGCTGTTTATAACCAGCC  
GGGTTATATGTTGGTCAACAAGCGCGCTTTGGTGGAAGGTTAT  
CAACGTTATCAATGGCAAAACGGATACGTTGTTAGAAATCTCTGT  
ATTACCGTTGGATAGCTATGCGAAGCCTGATATTGAAGCCAAC  
ATCAGGGCCGACTGCTCGCCAGACAAAGCGGCTTCCTTGATCCA  
GTGAACATATCGTAATCACTTTGTTACCATCTCGGCACCATTAG  
GGTGAACAACCTGGCTTTATCAATAAAGTCCCGTATAACTTCCTG  
GAAGTGAATATGCAGGGCATCCAGGTGTGGCATTGAGAGAAGT  
GGTTAATACCACCTATAACCTGTGGGATTACGGCTATGGTGATT  
CTGGCCGGAACCGGGCTGGGGTGCGCCTTACTACACCAATGCGG  
TGAGTCAGGTAACACCTGAGCTGGTCAAAAATTCGAGCTCGAAC  
AACAACAACAATAACAATAACAACAACCTCGGGATCGAGGGAA  
GGATTTACATATGAGCATTGGCACCGGCGATCGCATTAACACCG  
TGCGCGGCCCCGATTACCATTAGCGAAGCGGGCTTTACCCTGACCCAT  
GAACATATTTGCGGCAGCAGCGCGGGCTTTCTGCGCGCGTGCGCGG  
AATTTTTTGGCAGCCGCAAAGCGCTGGCGGAAAAAGCGGTGCGCGG  
CCTGCGCCGCGCGCGCGCGGGCGTGCGCACCATTTGTGGATGTG  
AGCACCTTTGATATTGGCCGCGATGTGAGCCTGCTGGCGGAAGTGA  
CCGCGCGGCGGATGTGCATATTGTGGCGGCGACAGGCCTGTGGTTTG  
ATCCGCCGCTGAGCATGCGCCTGCGCAGCGTGGAAGAACTGACCCA  
GTTTTTTCTGCGCGAAATTCAGTATGGCATTGAAGATACCGGCATT  
GCGCGGGCATTATTAAAGTGGCGACCACCGGCAAAGCGACCCCGT  
TCAGGAACTGGTGCTGAAAGCGGCGGCGCGCGAGCCTGGCGACC  
GGCGTGCCGGTGACCACCCATACCGCGGCGAGCCAGCGCGATGGCG

AACAGCAGGCGGCGATTTTTGAAAGCGAAGGCCTGAGCCCGAGCCG  
CGTGTGCATTGGCCATAGCGATGATACCGATGATCTGAGCTATCTGA  
CCGCGCTGGCGGCGCGCGGCTATCTGATTGGCCTGGATCATATTCCG  
CATAGCGCGATTGGCCTGGAAGATAACGCGAGCGCGAGCGCGCTGC  
TGGGCATTTCGCAGCTGGCAGACCCGCGCGCTGCTGATTAAAGCGCTG  
ATTGATCAGGGCTATATGAAACAGATTCTGGTGAGCAACGATTGGCT  
GTTTGGCTTTAGCAGCTATGTGACCAACATTATGGATGTGATGGATC  
GCGTGAACCCGGATGGCATGGCGTTTATTCCGCTGCGCGTGATTCCG  
TTTCTGCGCGAAAAAGGCGTGCCGCAGGAAACCTGGCGGGCATT  
CCGTGACCAACCCGGCGCGCTTTCTGAGCCCGACCCCTGCGCGCGAGC  
GAATTCCCTGCAGGTAATTAACACCTGAGCTGGTCAA

SlyB-PTE

ATGATTAAACGCGTATTGGTTGTTTCAATGGTAGGTCTGTCTCTTG  
TCGGTTGTGTTAATAACGACACCCTGTCAGGGGATGTTTATACCG  
CTTCTGAAGCGAAACAAGTACAGAATGTCAGCTATGGCACCATC  
GTTAACGTACGTCCGGTACAGATTCAGGGCGGTGATGATTCCAA  
CGTTATCGGTGCAATTGGCGGTGCTGTTCTTGGTGGTTTCCTGGGG  
AATACTGTTGGTGGCGGAACCGGGCGTTCTCTGGCTACTGCAGC  
AGGCGCTGTTGCAGGTGGCGTAGCTGGTCAGGGCGTACAGAGTG  
CAATGAACAAAACGCAGGGTGTGAGCTGGAAATTCGTAAAGA  
CGATGGTAATACCATCATGGTGGTACAGAAACAAGGCAACACTC  
GTTTCTCTCCGGGCCAACGTGTCGTAAGTGGCCAGCAATGGCAGTC  
AGGTGACCGTTTCTCCGCGCAATTCGAGCTCGAACAACAACAAC  
AATAACAATAACAACAACCTCGGGATCGAGGGAAGGATTTTAC  
ATATGAGCATTGGCACCGGCGATCGCATTAAACACCGTGCGCGGCC  
CGATTACCATTAGCGAAGCGGGCTTTACCCTGACCCATGAACATATT  
TGCGGCAGCAGCGCGGGCTTTCTGCGCGCGTGGCCGGAATTTTTTG  
CAGCCGCAAAGCGCTGGCGGAAAAAGCGGTGCGCGGCCTGCGCCGC  
GCGCGCGCGGCGGGCGTGGCACCATTGTGGATGTGAGCACCTTTG  
ATATTGGCCGCGATGTGAGCCTGCTGGCGGAAGTGAGCCGCGCGGC  
GGATGTGCATATTGTGGCGGCGACAGGCCTGTGGTTTGATCCGCCGC  
TGAGCATGCGCCTGCGCAGCGTGGAAGAACTGACCCAGTTTTTCTG  
CGCGAAATTCAGTATGGCATTGAAGATACCGGCATTGCGCGGGCA  
TTATTAAAGTGCGGACCACCGGCAAAGCGACCCCGTTTCAGGAACT  
GGTGCTGAAAGCGGCGGCGCGCGAGCCTGGCGACCGGCGTGCCG  
GTGACCACCCATACCGCGGCGAGCCAGCGCGATGGCGAACAGCAGG  
CGGCGATTTTTGAAAGCGAAGGCCTGAGCCCCAGCCGCGTGTGCATT  
GGCCATAGCGATGATACCGATGATCTGAGCTATCTGACCGCGCTGGC  
GGCGCGCGGCTATCTGATTGGCCTGGATCATATTCCGCATAGCGCA  
TTGGCCTGGAAGATAACGCGAGCGCGAGCGCGCTGCTGGGCATTTC  
CAGCTGGCAGACCCGCGCGCTGCTGATTAAAGCGCTGATTGATCAG  
GGCTATATGAAACAGATTCTGGTGAGCAACGATTGGCTGTTTGGCTT  
TAGCAGCTATGTGACCAACATTATGGATGTGATGGATCGCGTGAACC  
CGGATGGCATGGCGTTTATTCCGCTGCGCGTGATTCCGTTTCTGCGC  
GAAAAAGGCGTGCCGCAGGAAACCTGGCGGGCATTACCGTGACCA  
ACCCGCGCGCTTTCTGAGCCCGACCCCTGCGCGCGAGCGAATTCCC  
TGCAGGTAATTAA

Lpp'-DFPase

TTTGTTTAACTTTAAGAAGGAGATATACCATGAAAGCGACCAAA  
CTGGTGCTGGGCGCGGTGATTCTGGGCAGCACCCCTGCTGGCGGG  
CTGCAGCAGCAACGCGAAAATTGATCAGGGCGGTGGCAGCGG

CGGTGGCAGCGGCGGTGGGAGCATGGGGGAAATCCCTGTCATTGA  
 GCCGCTGTTTACCAAAGTCACCGAAGATATCCCGGGTGCCGAGGGTC  
 CGGTGTTTCGACAAAAACGGTGACTTTTACATCGTTGCGCCGGCAGTT  
 GAAGTGAATGGCAAGCCTGCTGGTGAGATTCTGCGTATTGACCTGAA  
 AACGGGCAAGAAAAACGGTGATTTGTAAACCTGAAGTTAATGGTTAT  
 GGCGGCATCCCGGCCGGTTGCCAATGCGATCGTGATGCCAACCAACT  
 GTTCGTGGCAGACATGCGCCTGGGCCTGTTGGTCGTTTCAGACCGACG  
 GCACCTTCGAAGAAATCGCGAAAAAAGACTCCGAGGGTCGTCGTAT  
 GCAGGGCTGCAATGACTGCGCGTTCGACTACGAGGGCAATCTGTGG  
 ATTACCGCGCCAGCGGGCGAAGTCGCTCCGGCGGATGCTACCGCGA  
 GCATGCAAGAAAAGTTCCGGTAGCATTTATTGTTTCACGACTGATGGC  
 CAGATGATTCAAGTCGATACGGCGTTCCAATTTCCGAATGGTATTGC  
 GGTCCGTCACATGAACGATGGTCGCCCCGTACCAGCTGATCGTTGCCG  
 AGATGCCGACTAAGAAATTGTGGTCGTACGACATCAAGGGTCCGGC  
 AAAGATTGAGAACAAAAAAGTGTGGGGTCACATTCCGGGTACGCAT  
 GAGGGTGGCGCGGATGGTATGGATTTTGACGAAGATAACAACCTTGC  
 TGGTTGCAAATTGGGGTTCTAGCCACATCGAAGTCTTTGGTCCGGAT  
 GGTGGCCAGCCGAAGATGCGCATCCGTTGCCCGTTTCGAGAAGCCGA  
 GCAATCTGCACTTCAAGCCGCAGACCAAGACGATTTTGTGACCGAG  
 CATGAGAAACAATGCAGTTTGGAAATTTGAGTGGCAACGTAACGGTA  
 AGAAACAGTATTGTGAAACCCTGAAGTTTGGTATCTTCCACCACCAC  
 CACCACCACTGA

L3- DFPase

TTTGTTTAACTTTAAGAAGGAGATATACCATGAAAGCGACCAAA  
 CTGGTGCTGGGCGCGGTGATTCTGGGCAGCACCTGCTGGCGGG  
 CTGCAGCAGCAACGCGAAAAATTGATCAGGGCGGTGGCAGCGG  
 CGGTGGCAGCGGCGGTGGGAGCGCCACCGGTCCGGCAAGCGGT  
 CCGACCAGCGCAGGTCCGATGGGGGAAATCCCTGTCATTGAGCCG  
 CTGTTTACCAAAGTCACCGAAGATATCCCGGGTGCCGAGGGTCCGGT  
 GTTCGACAAAAACGGTGACTTTTACATCGTTGCGCCGGCAGTTGAAG  
 TGAATGGCAAGCCTGCTGGTGAGATTCTGCGTATTGACCTGAAAACG  
 GGCAAGAAAACGGTGATTTGTAAACCTGAAGTTAATGGTTATGGCG  
 GCATCCCGGCCGGTTGCCAATGCGATCGTGATGCCAACCAACTGTT  
 GTGGCAGACATGCGCCTGGGCCTGTTGGTCGTTTCAGACCGACGGCAC  
 CTTGGAAGAAATCGCGAAAAAAGACTCCGAGGGTCGTCGTATGCAG  
 GGCTGCAATGACTGCGCGTTTCGACTACGAGGGCAATCTGTGGATTAC  
 CGCGCCAGCGGGCGAAGTCGCTCCGGCGGATGCTACCGCGAGCATG  
 CAAGAAAAGTTCCGGTAGCATTTATTGTTTCACGACTGATGGCCAGAT  
 GATTCAAGTCGATACGGCGTTCCAATTTCCGAATGGTATTGCGGTCC  
 GTCACATGAACGATGGTCGCCCCGTACCAGCTGATCGTTGCCGAGATG  
 CCGACTAAGAAATTGTGGTCGTACGACATCAAGGGTCCGGCAAAGA  
 TTGAGAACAAAAAAGTGTGGGGTCACATTCCGGGTACGCATGAGGG  
 TGGCGCGGATGGTATGGATTTTGACGAAGATAACAACCTTGCTGGTTG  
 CAAATTGGGGTTCTAGCCACATCGAAGTCTTTGGTCCGGATGGTGGC  
 CAGCCGAAGATGCGCATCCGTTGCCCGTTTCGAGAAGCCGAGCAATC  
 TGCACTTCAAGCCGCAGACCAAGACGATTTTGTGACCGAGCATGAG  
 AACAATGCAGTTTGGAAATTTGAGTGGCAACGTAACGGTAAGAAAC  
 AGTATTGTGAAACCCTGAAGTTTGGTATCTTCCACCACCACCAC  
 CACTGA

L4- DFPase

TTTGTTTAACTTTAAGAAGGAGATATACCATGAAAGCGACCAAA  
CTGGTGCTGGGCGCGGTGATTCTGGGCAGCACCTGCTGGCGGG  
CTGCAGCAGCAACGCGAAAATTGATCAGGCGCGGTGGCAGCGG  
CGGTGGCAGCGGCGGTGGGAGCCCGGCATCTCCGGCCCCGCCGG  
CTGGTCCAGCACCGCCGGCCCCAACC GCACCGATGGGGGAAATC  
CCTGTCATTGAGCCGCTGTTTACCAAAGTCACCGAAGATATCCCGGG  
TGCCGAGGGTCCGGTGTTTCGACAAAAACGGTGACTTTTACATCGTTG  
CGCCGGCAGTTGAAGTGAATGGCAAGCCTGCTGGTGAGATTCTGCGT  
ATTGACCTGAAAACGGGCAAGAAAACGGTGATTGTAAACCTGAAG  
TTAATGGTTATGGCGGCATCCCGGCCGGTTGCCAATGCGATCGTGAT  
GCCAACCAACTGTTCTGTGGCAGACATGCGCCTGGGCCTGTTGGTCGT  
TCAGACCGACGGCACCTTCGAAGAAATCGCGAAAAAAGACTCCGAG  
GGTCGTCTGATGCAGGGCTGCAATGACTGCGCGTTCGACTACGAGG  
GCAATCTGTGGATTACCGCGCCAGCGGGCGAAGTCGCTCCGGCGGA  
TGCTACCGCGAGCATGCAAGAAAAGTTCGGTAGCATTATTGTTTCA  
CGACTGATGGCCAGATGATTCAAGTCGATACGGCGTTCCAATTTCCG  
AATGGTATTGCGTCCGTCACATGAACGATGGTCGCCCCGTACCAGCT  
GATCGTTGCCGAGATGCCGACTAAGAAATTGTGGTCGTACGACATCA  
AGGGTCCGGCAAAGATTGAGAACAAAAAAGTGTGGGGTCACATTCC  
GGGTACGCATGAGGGTGGCGCGGATGGTATGGATTTTGACGAAGAT  
AACAACTTGCTGGTTGCAAATTGGGGTTCTAGCCACATCGAAGTCTT  
TGGTCCGGATGGTGGCCAGCCGAAGATGCGCATCCGTTGCCCGTTCCG  
AGAAGCCGAGCAATCTGCACTTCAAGCCGCAGACCAAGACGATTTT  
TGTGACCGAGCATGAGAACAATGCAGTTTGAAAATTTGAGTGCGAA  
CGTAACGGTAAGAAACAGTATTGTGAAACCCTGAAGTTTGGTATCTT  
CCACCACCACCACCACCTGA

L34- DFPase

TTTGTTTAACTTTAAGAAGGAGATATACCATGAAAGCGACCAAA  
CTGGTGCTGGGCGCGGTGATTCTGGGCAGCACCTGCTGGCGGG  
CTGCAGCAGCAACGCGAAAATTGATCAGGCGCGGTGGCAGCGG  
CGGTGGCAGCGGCGGTGGGAGCGCCACCGGTCCGGCAAGCGGT  
CCGACCAGCGCAGGTCCGCCGGCATCTCCGGCCCCGCCGGCTGG  
TCCAGCACCGCCGGCCCCAACC GCACCGATGGGGGAAATCCCTGT  
CATTGAGCCGCTGTTTACCAAAGTCACCGAAGATATCCCGGGTGCCG  
AGGGTCCGGTGTTTCGACAAAAACGGTGACTTTTACATCGTTGCGCCG  
GCAGTTGAAGTGAATGGCAAGCCTGCTGGTGAGATTCTGCGTATTGA  
CCTGAAAACGGGCAAGAAAACGGTGATTGTAAACCTGAAGTTAAT  
GGTTATGGCGGCATCCCGGCCGGTTGCCAATGCGATCGTGATGCCAA  
CCAATGTTCTGTGGCAGACATGCGCCTGGGCCTGTTGGTCGTTTCA  
CCGACGGCACCTTCGAAGAAATCGCGAAAAAAGACTCCGAGGGTCCG  
TCGTATGCAGGGCTGCAATGACTGCGCGTTCGACTACGAGGGCAATC  
TGTGGATTACCGCGCCAGCGGGCGAAGTCGCTCCGGCGGATGCTAC  
CGCGAGCATGCAAGAAAAGTTCGGTAGCATTATTGTTTCACGACTG  
ATGGCCAGATGATTCAAGTCGATACGGCGTTCCAATTTCCGAATGGT  
ATTGCGGTCCGTCACATGAACGATGGTCGCCCCGTACCAGCTGATCGT  
TGCCGAGATGCCGACTAAGAAATTGTGGTCGTACGACATCAAGGGT  
CCGGCAAAGATTGAGAACAAAAAAGTGTGGGGTCACATTCCGGGTA  
CGCATGAGGGTGGCGCGGATGGTATGGATTTTGACGAAGATAACAA  
CTTGCTGGTTGCAAATTGGGGTTCTAGCCACATCGAAGTCTTTGGTC  
CGGATGGTGGCCAGCCGAAGATGCGCATCCGTTGCCCGTTTCGAGAA  
GCCGAGCAATCTGCACTTCAAGCCGCAGACCAAGACGATTTTTGTGA

CCGAGCATGAGAACAAATGCAGTTTGGAAATTTGAGTGGCAACGTAA  
CGGTAAGAAACAGTATTGTGAAACCCTGAAGTTTGGTATCTTCACC  
ACCACCACCACCACTGA

ATGAACAATAACGATCTCTTTTCAGGCATCACGTCGGCGTTTTCTG  
 GCACAACTCGGCGGCTTAACCGTCGCCGGGATGCTGGGGCCGTC  
 ATTGTTAACGCCGCGACGTGCGACTGCGGCGCAAGCGCGGGTT  
 CTCATCATCATCATCATCATATGTTTTGAAATCCCTGTATTGAGCC  
 GCTGTTTACCAAAGTCACCGAAGATATCCCGGGTGCCGAGGGTCCG  
 GTGTTGACAAAAACGGTGACTTTTACATCGTTGCGCCGGCAGTTGA  
 AGTGAATGGCAAGCCTGCTGGTGAGATTCTGCGTATTGACCTGAAAA  
 CGGGCAAGAAAACGGTGATTGTAAACCTGAAGTTAATGGTTATGG  
 CGGCATCCCGGCCGGTTGCCAATGCGATCGTGATGCCAACCACTGT  
 TCGTGGCAGACATGCGCCTGGGCCTGTTGGTCGTTACAGCCGACGGC  
 ACCTTCGAAGAAATCGCGAAAAAAGACTCCGAGGGTCGTCGTATGC  
 AGGGCTGCAATGACTGCGCGTTCGACTACGAGGGCAATCTGTGGATT  
 ACCGCGCCAGCGGGCGAAGTCGCTCCGGCGGATGCTACCGCGAGCA  
 TGCAAGAAAAGTTTCGGTAGCATTATTGTTTACGACTGATGGCCAG  
 ATGATTCAAGTCGATACGGCGTTCCAATTTCCGAATGGTATTGCGGT  
 CCGTCACATGAACGATGGTCGCCCGTACCAGCTGATCGTTGCCGAGA  
 TGCCGACTAAGAAATTGTGGTCGTACGACATCAAGGGTCCGGCAAA  
 GATTGAGAACAAAAAAGTGTGGGGTCACATTCCGGGTACGCATGAG  
 GGTGGCGCGGATGGTATGGATTTTGACGAAGATAACAACCTTGCTGGT  
 TGCAAATTGGGGTTCTAGCCACATCGAAGTCTTTGGTCCGGATGGTG  
 GCCAGCCGAAGATGCGCATCCGTTGCCCGTTCGAGAAGCCGAGCAA  
 TCTGCACTTCAAGCCGCAGACCAAGACGATTTTTGTGACCGAGCATG  
 AGAACAATGCAGTTTGGAAATTTGAGTGGCAACGTAAACGGTAAGAA  
 ACAGTATTGTGAAACCCTGAAGTTTGGTATCTTCGGTACCGGTGGC  
 AGCGTTGATACCTTATCAGGTTTATCAAGTGAGCAAGGTCAGTCC  
 GGTGATATGACAATTGAAGAAGATAGTGCTACCCATATTAAATT  
 CTCAAAACGTGATGAGGACGGCAAAGAGTTAGCTGGTGCAACTA  
 TGGAGTTGCGTGATTCATCTGGTAAAACCTATTAGTACATGGATT  
 CAGATGGACAAGTGAAAGATTTCTACCTGTATCCAGGAAAATAT  
 ACATTTGTGCAAAACCGCAGCACCAGACGGTTATGAGGTAGCAAC  
 TGCTATTACCTTTACAGTTAATGAGCAAGGTCAGGTTACTGTAAA  
 TGGCAAAGCAACTAAAGGTGACGCTCATATTAGCGGAGGTGGA  
 GGTGAGCTCGTCGACTAA

DFPase -SC

ATGGCTAAGTCACTGTTTCAGGGCGCTGGTCGCCCTGTCTTTTCTTG  
 CGCCACTGTGGCTCAACGCCGCGCCGCGCGTCATCACGCTTCTC  
 CCGCCAACACTGAACTTGCCCTTGCCGCCGGGATCACGCCGGTTG  
 GGGTCAGCAGCTATTCCGACTATCCTCCACAAGCGCAAAAAGATT  
 GAGCAGGTTTCCACCTGGCAGGGGATGAATCTGGAACGCATTGT  
 CGCGCTGAAACCCGATCTGGTGATTGCCTGGCGTGAGGTAATG  
 CCGAGCGGCAGGTTGACCAGCTGGCTTCGCTGGGAATAAAAGTG  
 ATGTGGGTCGATGCGACAAGCATTGAACAAATTGCCAATGCGTT  
 ACGTCAACTGGCCCCCTGGAGTCCGCAACCAGACAAGGCCGAA  
 CAAGCCGCGCAATCCCTGCTGGATCAGTACGCGCAATTGAAAGC  
 GCAATATGCTGATAAACCTAAAAACGTGTTTTTCTGCAATTCGG  
 CATTAAATCCGCCATTTACCAGTGGAAAAGAGTCGATTGAGAACC  
 AGGTACTCGAAGTTTGTGGCGGAGAAAACATCTTTAAAGACAGC

BtuF-DFPase

CGGGTTCCTGGCCGCAAGTTAGCCGCGAACAGGTGTTAGCACG  
 CTCGCCACAGGCGATTGTCTATTACAGGCGGACCGGACCAAATTC  
 CTAAAATCAAACAATACTGGGGTGAACAGCTCAAAATTCCTCGTT  
 ATTCCTCTCACGAGTGACTGGTTTGAACGTGCAAGCCACGTATT  
 ATCCTCGCTGCACAACAGCTCTGTAATGCGCTTTCACAGGTAGAT  
 AATTCGAGCTCGAACAACAACAATAACAATAACAACAACC  
 TCGGGATCGAGGGAAGGATTCACATATGAGCATTGGCACCGGC  
 GATATGGGGGAAATCCCTGTCATTGAGCCGCTGTTTACCAAAGTCA  
 CGAAGATATCCCGGGTGGCGAGGGTCCGGTGTTCGACAAAAACGGT  
 GACTTTTACATCGTTGCGCCGGCAGTTGAAGTGAATGGCAAGCCTGC  
 TGGTGAGATTCTGCGTATTGACCTGAAAACGGGCAAGAAAACGGTG  
 ATTTGTAAACCTGAAGTTAATGGTTATGGCGGCATCCCGCCGGTTG  
 CCAATGCGATCGTGATGCCAACCAACTGTTCTGTCGAGACATGCGCC  
 TGGGCCTGTTGGTCGTTTACAGCCGACGGCACCTTCGAAGAAATCGCG  
 AAAAAAGACTCCGAGGGTCTGCGTATGCAGGGCTGCAATGACTGCG  
 CGTTCGACTACGAGGGCAATCTGTGGATTACCGCGCCAGCGGGCGA  
 AGTCGCTCCGGCGGATGCTACCGCGAGCATGCAAGAAAAGTTCGGT  
 AGCATTTATTGTTTCACGACTGATGGCCAGATGATTCAAGTCGATAC  
 GGCGTTCCAATTTCCGAATGGTATTGCGGTCCGTCACATGAACGATG  
 GTCGCCCCGTACCAGCTGATCGTTGCCGAGATGCCGACTAAGAAATTG  
 TGGTCGTACGACATCAAGGGTCCGGCAAAGATTGAGAACAATAAAG  
 TGTGGGGTCACATTCCGGGTACGCATGAGGGTGGCGCGGATGGTAT  
 GGATTTTGACGAAGATAACAACCTTGCTGGTTGCAAATTGGGGTTCTA  
 GCCACATCGAAGTCTTTGGTCCGGATGGTGGCCAGCCGAAGATGCG  
 CATCCGTTGCCCGTTTCGAGAAGCCGAGCAATCTGCACTTCAAGCCGC  
 AGACCAAGACGATTTTTGTGACCGAGCATGAGAAACAATGCAGTTTG  
 GAAATTTGAGTGGCAACGTAACGGTAAGAAACAGTATTGTGAAACC  
 CTGAAGTTTGGTATCTTCGAATTCCTGCAGGTAATTAA

MBP- DFPase

ATGAAAATAAAAACAGGTGCACGCATCCTCGCATTATCCGCATT  
 AACGACGATGATGTTTTCCGCCTCGGCTCTCGCCAAAATCGAAG  
 AAGGTAACTGGTAATCTGGATTAACGGCGATAAAGGCTATAAC  
 GGTCTCGCTGAAGTCGGTAAGAAATTCGAGAAAGATACCGGAAT  
 TAAAGTCACCGTTGAGCATCCGGATAAACTGGAAGAGAAATTC  
 CACAGGTTGCGGCAACTGGCGATGGCCCTGACATTATCTTCTGGG  
 CACACGACCGCTTTGGTGGCTACGCTCAATCTGGCCTGTTGGCTG  
 AAATCACCCCGGACAAAGCGTTCCAGGACAAGCTGTATCCGTTT  
 ACCTGGGATGCCGTACGTTACAACGGCAAGCTGATTGCTTACCC  
 GATCGCTGTTGAAGCGTTATCGCTGATTTATAACAAAGATCTGCT  
 GCCGAACCCGCCAAAAACCTGGGAAGAGATCCCGGCGCTGGAT  
 AAAGAAGTGAAGCGAAAGGTAAGAGCGCGCTGATGTTCAACC  
 TGCAAGAACCGTACTTCACCTGGCCGCTGATTGCTGCTGACGGG  
 GGTTATGCGTTCAAGTATGAAAACGGCAAGTACGACATTAAAGA  
 CGTGGGCGTGATAACGCTGGCGCGAAAGCGGGTCTGACCTTCC  
 TGGTTGACCTGATTAATAAACAAACACATGAATGCAGACACCGAT  
 TACTCCATCGCAGAAGCTGCCTTTAATAAAGGCGAAACAGCGAT  
 GACCATCAACGGCCCCGTGGGCATGGTCCAACATCGACACCAGCA  
 AAGTGAATTATGGTGTAACGGTACTGCCGACCTTCAAGGGTCAA  
 CCATCCAAACCGTTTCGTTGGCGTGCTGAGCGCAGGTATTAACGC  
 CGCCAGTCCGAACAAAGAGCTGGCAAAAGAGTTTCTCGAAAAC  
 TATCTGCTGACTGATGAAGGTCTGGAAGCGGTTAATAAAGACAA

ACCGCTGGGTGCCGTAGCGCTGAAGTCTTACGAGGAAGAGTTGG  
 TGAAAGATCCGCGTATTGCCGCCACTATGGAAAACGCCCAGAAA  
 GGTGAAATCATGCCGAACATCCCCGAGATGTCCGCTTTCTGGTAT  
 GCCGTGCGTACTGCGGTGATCAACGCCGCCAGCGGTCGTCAGAC  
 TGTCGATGAAGCCCTGAAAGACGCGCAGACTAATTCGAGCTCGA  
 ACAACAACAACAATAACAATAACAACAACCTCGGGATCGAGGG  
 AAGGATTCACATATGAGCATTGGCACCGGCGATATGGGGGAAA  
TCCCTGTCATTGAGCCGCTGTTACCAAAGTCACCGAAGATATCCCG  
GGTGCCGAGGGTCCGGTGTTTCGACAAAAACGGTGACTTTTACATCGT  
TGCGCCGGCAGTTGAAGTGAATGGCAAGCCTGCTGGTGAGATTCTGC  
GTATTGACCTGAAAACGGGCAAGAAAACGGTGATTGTAAACCTGA  
AGTTAATGGTTATGGCGGCATCCCGGCCGGTTGCCAATGCGATCGTG  
ATGCCAACCAACTGTTCTGTGGCAGACATGCGCCTGGGCCTGTTGGTC  
GTTTCAGACCGACGGCACCTTCGAAGAAATCGCGAAAAAAGACTCCG  
AGGGTCGTCTATGCAGGGCTGCAATGACTGCGCGTTCGACTACGA  
GGGCAATCTGTGGATTACCGCGCCAGCGGGCGAAGTCGCTCCGGCG  
GATGCTACCGCGAGCATGCAAGAAAAAGTTCGGTAGCATTATTTGTTT  
CACGACTGATGGCCAGATGATTCAAGTCGATACGGCGTTCCAATTC  
CGAATGGTATTGCGGTCCGTACATGAACGATGGTCGCCCCGTACCAG  
CTGATCGTTGCCGAGATGCCGACTAAGAAATTGTGGTCGTACGACAT  
CAAGGGTCCGGCAAAGATTGAGAACAACAAAAAGTGTGGGGTACATT  
CCGGGTACGCATGAGGGTGGCGCGGATGGTATGGATTTTGACGAAG  
ATAACAACCTGCTGGTTGCAAATTGGGGTTCTAGCCACATCGAAGTC  
TTTGGTCCGGATGGTGGCCAGCCGAAGATGCGCATCCGTTGCCCGTT  
CGAGAAGCCGAGCAATCTGCACTTCAAGCCGAGACCAAGACGATT  
TTTGTGACCGAGCATGAGAACAATGCAGTTTGAAAATTTGAGTGGA  
ACGTAACGGTAAGAAACAGTATTGTGAAACCCTGAAGTTTGGTATCT  
TCGAATTCCCTGCAGGTAATTAA

SLP- DFPaseE

ATGAACATGACAAAAGGTGCACTCATCCTCAGCCTTTCATTTTG  
 CTTGCCGCATGTAGTTCAATTCCGCAAAATATCAAAGGCAATAA  
 CCAACCTGATATTCAAAAAAGTTTTGTTGCTGTTTATAACCAGCC  
 GGGGTTATATGTTGGTCAACAAGCGCGCTTTGGTGGGAAGGTTAT  
 CAACGTTATCAATGGCAAAACGGATACGTTGTTAGAAATCTCTGT  
 ATTACCGTTGGATAGCTATGCGAAGCCTGATATTGAAGCCAACCT  
 ATCAGGGCCGACTGCTCGCCAGACAAAGCGGCTTCCTTGATCCA  
 GTGAACATATCGTAATCACTTTGTTACCATCCTCGGCACCATTGAG  
 GGTGAACAACCTGGCTTTATCAATAAAGTCCCGTATAACTTCCTG  
 GAAGTGAATATGCAGGGCATCCAGGTGTGGCATTGAGAGAAGT  
 GGTTAATACCACCTATAACCTGTGGGATTACGGCTATGGTGCATT  
 CTGGCCGGAACCGGGCTGGGGTGGCGCTTACTACACCAATGCGG  
 TGAGTCAGGTAACACCTGAGCTGGTCAAAAATTCGAGCTCGAAC  
 AACAACAACAATAACAATAACAACAACCTCGGGATCGAGGGAA  
 GGATTTACATATGAGCATTGGCACCGGCGATATGGGGGAAATCC  
CTGTCATTGAGCCGCTGTTACCAAAGTCACCGAAGATATCCCGGGT  
GCCGAGGGTCCGGTGTTTCGACAAAAACGGTGACTTTTACATCGTTGC  
GCCGGCAGTTGAAGTGAATGGCAAGCCTGCTGGTGAGATTCTGCGT  
ATTGACCTGAAAACGGGCAAGAAAACGGTGATTGTAAACCTGAAG  
TTAATGGTTATGGCGGCATCCCGGCCGGTTGCCAATGCGATCGTGAT  
GCCAACCAACTGTTCTGTGGCAGACATGCGCCTGGGCCTGTTGGTCGT  
TCAGACCGACGGCACCTTCGAAGAAATCGCGAAAAAAGACTCCGAG

GGTCGTCGTATGCAGGGCTGCAATGACTGCGCGTTCTGACTACGAGG  
 GCAATCTGTGGATTACCGCGCCAGCGGGCGAAGTCGCTCCGGCGGA  
 TGCTACCGCGAGCATGCAAGAAAAGTTCGGTAGCATTATTGTTTCA  
 CGACTGATGGCCAGATGATTCAAGTCGATACGGCGTTCCAATTTCCG  
 AATGGTATTGCGGTCCGTCACATGAACGATGGTCGCCCCGTACCAGCT  
 GATCGTTGCCGAGATGCCGACTAAGAAATTGTGGTCGTACGACATCA  
 AGGGTCCGGCAAAGATTGAGAACAAAAAGTGTGGGGTCACATTCC  
 GGGTACGCATGAGGGTGGCGCGGATGGTATGGATTTTGACGAAGAT  
 AACAACTTGCTGGTTGCAAATTGGGGTTCTAGCCACATCGAAGTCTT  
 TGGTCCGGATGGTGGCCAGCCGAAGATGCGCATCCGTTGCCCGTTCCG  
 AGAAGCCGAGCAATCTGCACTTCAAGCCGAGACCAAGACGATTTT  
 TGTGACCGAGCATGAGAACAATGCAGTTTGAAATTTGAGTGGCAA  
 CGTAACGGTAAGAAACAGTATTGTGAAACCCTGAAGTTTGGTATCTT  
 CGAATTCCTGCAGGTAATTAA

SlyB- DFPase

ATGATTAAACGCGTATTGGTTGTTTCAATGGTAGGTCTGTCTCTTG  
 TCGGTTGTGTTAATAACGACACCCTGTCAGGGGATGTTTATACCG  
 CTTCTGAAGCGAAACAAGTACAGAATGTCAGCTATGGCACCATC  
 GTTAACGTACGTCCGGTACAGATTCAGGGCGGTGATGATTCCAA  
 CGTTATCGGTGCAATTGGCGGTGCTGTTCTTGGTGGTTTCTCTGGGG  
 AATACTGTTGGTGGCGGAACCGGGCGTTCTCTGGCTACTGCAGC  
 AGGCGCTGTTGCAGGTGGCGTAGCTGGTCAGGGCGTACAGAGTG  
 CAATGAACAAAACGCAGGGTGTGAGCTGGAAATTCGTAAAGA  
 CGATGGTAATACCATCATGGTGGTACAGAAACAAGGCAACACTC  
 GTTCTCTCCGGGCCAACGTGTCGTAAGTGGCCAGCAATGGCAGTC  
 AGGTGACCGTTTCTCCGCGCAATTCGAGCTCGAACAACAACAAC  
 AATAACAATAACAACAACCTCGGGATCGAGGGAAGGATTTTAC  
 ATATGAGCATTGGCACCGGCGATATGGGGGAAATCCCTGTCATTG  
 AGCCGCTGTTTACCAAAGTCACCGAAGATATCCCGGGTGCCGAGGG  
 TCCGGTGTTGACAAAAACGGTGACTTTTACATCGTTGCGCCGGCAG  
 TTGAAGTGAATGGCAAGCCTGCTGGTGAGATTCTGCGTATTGACCTG  
 AAAACGGGCAAGAAAACGGTGATTGTAAACCTGAAGTTAATGGTT  
 ATGGCGGCATCCCGGCCGGTTGCCAATGCGATCGTGATGCCAACCA  
 ACTGTTCTGTTGGCAGACATGCGCCTGGGCTGTTGGTCGTTTACGACCG  
 ACGGCACCTTCGAAGAAATCGCGAAAAAAGACTCCGAGGGTCGTGC  
 TATGCAGGGCTGCAATGACTGCGCGTTTCTGACTACGAGGGCAATCTGT  
 GGATTACCGCGCCAGCGGGCGAAGTCGCTCCGGCGGATGCTACCGC  
 GAGCATGCAAGAAAAGTTCGGTAGCATTATTGTTTACGACTGATG  
 GCCAGATGATTCAAGTCGATACGGCGTTCCAATTTCCGAATGGTATT  
 GCGGTCCGTCACATGAACGATGGTCGCCCCGTACCAGCTGATCGTTGC  
 CGAGATGCCGACTAAGAAATTGTGGTCGTACGACATCAAGGGTCCG  
 GCAAAGATTGAGAACAAAAAAGTGTGGGGTCACATTCCGGGTACCG  
 ATGAGGGTGGCGCGGATGGTATGGATTTTGACGAAGATAACAACCT  
 GCTGTTGCAAATTGGGGTTCTAGCCACATCGAAGTCTTTGGTCCGG  
 ATGGTGGCCAGCCGAAGATGCGCATCCGTTGCCCGTTGAGAAGCC  
 GAGCAATCTGCACTTCAAGCCGAGACCAAGACGATTTTTGTGACCG  
 AGCATGAGAACAAATGCAGTTTGGAAATTTGAGTGGCAACGTAACGG  
 TAAGAAACAGTATTGTGAAACCCTGAAGTTTGGTATCTTCGAATTC  
 CTGCAGGTAATTAA

RBS – Underlined.

Lpp' – Bold

Linker/Fusion partner - Shaded

6x-His – Bold, Italics

PTE/DFPase – Italics, Underlined
